# Supplementary material
Source: publisher figshare collection journal article supplement (https://tandf.figshare.com/articles/dataset/_/6848342)
Supplement: Supplementary file 1 [file 1]

1 Supplemental material

2 Table S1. Composition of experimental diets (g/kg)

|                           | Control <sup>a</sup> | High-fat <sup>b</sup> |
|---------------------------|----------------------|-----------------------|
| Cornstarch (Amyl-alpha)   | 529.5                | 299.5                 |
| Sucrose                   | 100.0                | 100.0                 |
| Casein                    | 200.0                | 200.0                 |
| L-Cystine                 | 3.0                  | 3.0                   |
| Soybean oil               | 70.0                 | 70.0                  |
| Lard                      | 0                    | 230.0                 |
| Cellulose                 | 50.0                 | 50.0                  |
| Mineral mixture (AIN-93G) | 35.0                 | 35.0                  |
| Vitamin mixture (AIN-93)  | 10.0                 | 10.0                  |
| Choline bitartrate        | 2.5                  | 2.5                   |
| Total                     | 1000.0               | 1000.0                |
| t-Butylhydroquinone       | 0.014                | 0.014                 |

3 <sup>a</sup>Energy content, 17.2 MJ/kg

4 <sup>b</sup>Energy content, 22.0 MJ/kg
